# Supplementary material
Source: HighWire-hosted journal article supplement (http://www.cmaj.ca/highwire/filestream/68011/field_highwire_adjunct_files/2/170088-res-3-at.pdf)
Supplement: 170088-res-3-at.pdf [file 170088-res-3-at.pdf]

**Appendix 3 (as supplied by the authors):** Institute for Clinical Evaluative Sciences (ICES) variables and respective databases and diagnostic codes

| ICES Variable                                                         | OHIP/OMHRS/ICD-9                                                                                                                                                                                                                                                                                                                                                                                           | ICD-10 / ACG                                                                                                                      |
|-----------------------------------------------------------------------|------------------------------------------------------------------------------------------------------------------------------------------------------------------------------------------------------------------------------------------------------------------------------------------------------------------------------------------------------------------------------------------------------------|-----------------------------------------------------------------------------------------------------------------------------------|
| History of self-harm/suicide attempts within 1 and 3 years preceding* | Self Harm E950-959 or an undetermined (UD) E980-989 E code                                                                                                                                                                                                                                                                                                                                                 | Self Harm: self-inflicted injuries X60-X64, includes undetermined poisonings (Y10-Y19) and undetermined cut/pierce (Y28) injuries |
| Psychotic disorders                                                   | Schizophrenia: 295;<br>Non-schizophrenia psychotic disorder: 293,297,298                                                                                                                                                                                                                                                                                                                                   | Schizophrenia: F20, F25;<br>Non-schizophrenia psychotic disorder: F22,F23,F24,F28,F29                                             |
| Mood disorders                                                        | Major Depression/ Bipolar disorder: 296, 301 (cyclothymic disorder), 311 (Depressive Disorder NOS)                                                                                                                                                                                                                                                                                                         | Major Depression/ Bipolar disorder: F30-34,F38-39                                                                                 |
| Anxiety and related disorders                                         | Anxiety / Somatoform/ Dysthymia / Dissociative: 300,308,309                                                                                                                                                                                                                                                                                                                                                | Anxiety / Somatoform/ Dysthymia / Dissociative: F40,41,42,F43.0,43.1,43.8,43.9, F44,F45                                           |
| Alcohol and substance related disorders                               | Alcohol / Substance-related disorder: 291, 303, 304, 305                                                                                                                                                                                                                                                                                                                                                   | Alcohol / Substance-related disorders: F10-F19                                                                                    |
| Eating disorders                                                      | Eating disorders: 307                                                                                                                                                                                                                                                                                                                                                                                      | Eating disorders: F50                                                                                                             |
| Personality disorders                                                 | Personality disorders: 301; ICD-10: F60,F61                                                                                                                                                                                                                                                                                                                                                                | Personality disorders: F60,F61                                                                                                    |
| Sexual disorders                                                      | Sexual disorders: 302                                                                                                                                                                                                                                                                                                                                                                                      | Sexual disorders: F65, F52                                                                                                        |
| Adjustment disorders                                                  | Adjustment Disorders: 309                                                                                                                                                                                                                                                                                                                                                                                  | Adjustment Disorders: F43.2                                                                                                       |
| Outpatient psychiatric contact                                        | OHIP specialist code for psychiatry 19                                                                                                                                                                                                                                                                                                                                                                     |                                                                                                                                   |
| Mental health visit with primary care provider                        | OHIP all mental health codes (K005, K007, K623) plus general service codes (A001,3-8;A888;A905,6) with a mental health diagnostic code (290, 295-298; 300-304: 306; 309; 311, 331, 797, 897-902; 904-906,909), or nonmental health contact either with the primary care provider (general service codes (A001,3-8;A888;A905,6) with a mental health diagnostic code (290, 295-298; 300-304: 306; 309; 311, |                                                                                                                                   |

|                             |                                                                                                                                                               |                                                                                                                                                               |
|-----------------------------|---------------------------------------------------------------------------------------------------------------------------------------------------------------|---------------------------------------------------------------------------------------------------------------------------------------------------------------|
|                             | 331, 797, 897-902; 904-906,909) with OHIP specialist code 00                                                                                                  |                                                                                                                                                               |
| Psychiatric hospitalization | Mental Health Working Group Definition 0, using all diagnostic fields CIHI-DAD: Any diagnosis in (ICD9 290-319; ICD10 F00-F99) or OMHRS: Any OMHRS discharge) | Mental Health Working Group Definition 0, using all diagnostic fields CIHI-DAD: Any diagnosis in (ICD9 290-319; ICD10 F00-F99) or OMHRS: Any OMHRS discharge) |
| Prior medical morbidity     |                                                                                                                                                               | From John Hopkin's ACG system (including 3,4,9,11,16,22,32 but excluding major psychosocial ADGs**                                                            |

Abbreviations:

\* Available after 2002 from National Ambulatory Care Reporting System (NACRS)

\*\* Aggregated Diagnosis Groups (ADGs)
